# Supplementary material
Source: PubMed Central journal article supplement (PMC6563596)
Supplement: jamapediatr-173-754-s001.pdf [file jamapediatr-173-754-s001.pdf]

## Supplementary Online Content

Guindon GE, Paraje GR, Chaloupka FJ. Association of tobacco control policies with smoking onset in Chile. *JAMA Pediatr*. Published online June 10, 2019. doi:10.1001/jamapediatrics.2019.1500

**eAppendix.** Tax changes on manufactured cigarettes, 1982-2018

**eTable 1.** Discrete-time complementary loglog (cloglog) duration models of smoking initiation, 16-19 years old at interview — full results

**eTable 2.** Discrete-time complementary loglog (cloglog) duration models of smoking initiation, 16-19 years old at interview — prices

**eTable 3.** Discrete-time complementary loglog (cloglog) duration models of smoking initiation, 16-19 years old at interview — Law 20105

**This supplementary material has been provided by the authors to give readers additional information about their work.**

## **eAppendix 1. Tax changes on manufactured cigarettes, 1982—2018**

Taxes on manufactured cigarettes were successively increased in 1982, 1995 and 1998. The ad-valorem tax (applied on the industry-reported retail price) was increased from 42.9 to 52.9% in 1982, to 55.4% in 1995 and to 60.4% in November 1998 (effective from January 1999). In 2010, to help finance reconstruction after a devastating earthquake, the ad-valorem excise tax rate was increased marginally from 60.4% to 62.3% and a small inflation-adjusted specific tax of 50CLP (approximately 0.08USD) per pack of 20 cigarettes (about 3% of retail price) was introduced. In 2012, the ad-valorem tax was decreased to 60.5% while the inflation-adjusted specific tax was roughly doubled to about 100CLP; on net, this tax change put little upward pressure on prices. Finally, in 2014 the ad-valorem tax was further decreased to 30%; a change which was more than offset by a more than eight-fold increase in the inflation-adjusted specific tax to about 875CLP (1.30USD) per pack of 20 cigarettes. As a result, the structure of cigarette taxes shifted from a predominantly proportional ad-valorem excise tax-based approach to one that relies on a fixed per-pack specific tax. The intended effect of such a change in tax structure was to raise the price of cheaper brands by proportionally more than higher priced ‘premium brands. The tax burden on premium brands, on the other hand, likely actually fell.

**eTable 1. Discrete-time complementary loglog (cloglog) duration models of smoking initiation, 16-19 years old at interview — full results**

| Model                                | (1)       |            |      |              | (2)   |            |      |              |    |
|--------------------------------------|-----------|------------|------|--------------|-------|------------|------|--------------|----|
|                                      | Variables | Est.       | SE   | HR           | CI    | Est.       | SE   | HR           | CI |
| Prices (in ln)                       |           |            |      |              |       |            |      |              |    |
| cigarette                            | -0.36     | (0.020)*** | 0.70 | (0.67, 0.72) | -0.27 | (0.026)*** | 0.76 | (0.73, 0.81) |    |
| alcohol                              | 1.06      | (0.064)*** | 2.89 | (2.55, 3.29) | 1.07  | (0.064)*** | 2.92 | (2.56, 3.29) |    |
| Law 20105, August 2006               | -0.16     | (0.012)*** | 0.85 | (0.83, 0.87) | -0.22 | (0.016)*** | 0.80 | (0.78, 0.83) |    |
| Sex (ref, boys)                      | -0.15     | (0.006)*** | 0.86 | (0.85, 0.87) | 0.74  | (0.143)*** | 2.10 | (1.59, 2.78) |    |
| Education, mother (ref, primary)     |           |            |      |              |       |            |      |              |    |
| secondary                            | 0.04      | (0.008)*** | 1.04 | (0.85, 0.87) | 0.04  | (0.008)*** | 1.04 | (1.59, 2.78) |    |
| > secondary                          | 0.03      | (0.009)*** | 1.03 | (1.03, 1.06) | 0.03  | (0.009)*** | 1.03 | (1.03, 1.06) |    |
| School type (ref, pública municipal) |           |            |      |              |       |            |      |              |    |
| privada subvencionada                | 0.01      | (0.009)    | 1.01 | (1.01, 1.05) | 0.01  | (0.009)    | 1.01 | (1.01, 1.05) |    |
| privada pagada                       | -0.03     | (0.012)**  | 0.97 | (0.99, 1.03) | -0.03 | (0.012)**  | 0.97 | (0.99, 1.03) |    |
| Region (ref, Santiago)               |           |            |      |              |       |            |      |              |    |
| Arica, Parinacota, Tarapacá          | -0.18     | (0.019)*** | 0.84 | (0.80, 0.87) | -0.18 | (0.019)*** | 0.84 | (0.80, 0.87) |    |
| Antofagasta                          | -0.05     | (0.021)**  | 0.95 | (0.91, 0.99) | -0.05 | (0.021)**  | 0.95 | (0.91, 0.99) |    |
| Atacama                              | -0.05     | (0.025)*   | 0.95 | (0.91, 1.00) | -0.05 | (0.025)**  | 0.95 | (0.91, 1.00) |    |
| Coquimbo                             | -0.06     | (0.021)*** | 0.94 | (0.90, 0.98) | -0.06 | (0.021)*** | 0.94 | (0.90, 0.98) |    |
| Valparaíso                           | -0.06     | (0.013)*** | 0.94 | (0.92, 0.97) | -0.06 | (0.013)*** | 0.94 | (0.92, 0.97) |    |
| O'Higgins                            | -0.11     | (0.019)*** | 0.90 | (0.87, 0.93) | -0.11 | (0.019)*** | 0.90 | (0.87, 0.93) |    |
| Maule                                | -0.20     | (0.016)*** | 0.82 | (0.79, 0.84) | -0.20 | (0.016)*** | 0.82 | (0.79, 0.84) |    |
| Biobío                               | -0.12     | (0.013)*** | 0.89 | (0.87, 0.91) | -0.12 | (0.013)*** | 0.89 | (0.87, 0.91) |    |
| Araucanía                            | -0.13     | (0.021)*** | 0.88 | (0.84, 0.91) | -0.13 | (0.021)*** | 0.88 | (0.84, 0.91) |    |
| Los Lagos                            | -0.03     | (0.017)*   | 0.97 | (0.94, 1.00) | -0.03 | (0.017)*   | 0.97 | (0.94, 1.00) |    |
| Aysén                                | 0.03      | (0.038)    | 1.03 | (0.96, 1.11) | 0.03  | (0.038)    | 1.03 | (0.96, 1.11) |    |
| Magallanes                           | 0.05      | (0.030)*   | 1.05 | (0.99, 1.12) | 0.05  | (0.030)*   | 1.05 | (1.00, 1.12) |    |
| Duration dependency                  |           |            |      |              |       |            |      |              |    |

|                                      |             |            |           |              |             |            |           |              |
|--------------------------------------|-------------|------------|-----------|--------------|-------------|------------|-----------|--------------|
| <i>t</i>                             | 0.05        | (0.002)*** |           |              | 0.05        | (0.002)*** |           |              |
| <i>t</i> <sup>2</sup>                | 0.00        | (0.000)*** |           |              | 0.00        | (0.000)*** |           |              |
| <b>Model</b>                         | <b>(1)</b>  |            |           |              | <b>(2)</b>  |            |           |              |
| <b>Variables</b>                     | <b>Est.</b> | <b>SE</b>  | <b>HR</b> | <b>CI</b>    | <b>Est.</b> | <b>SE</b>  | <b>HR</b> | <b>CI</b>    |
| <i>t</i> <sup>3</sup>                | -0.00       | (0.000)*** |           |              | -0.00       | (0.000)*** |           |              |
| Interactions                         |             |            |           |              |             |            |           |              |
| cig. price x sex                     |             |            |           |              | -0.20       | (0.032)*** |           |              |
| cig. price x 'secondary'             |             |            |           |              |             |            |           |              |
| cig. price x > 'secondary'           |             |            |           |              |             |            |           |              |
| cig. price x 'privada subvencionada' |             |            |           |              |             |            |           |              |
| cig. price x 'privada pagada'        |             |            |           |              |             |            |           |              |
| Law 20105 x sex                      |             |            |           |              | 0.12        | (0.020)*** |           |              |
| Law 20105 x secondary                |             |            |           |              |             |            |           |              |
| Law 20105 x > secondary              |             |            |           |              |             |            |           |              |
| Law 20105 x 'privada subvencionada'  |             |            |           |              |             |            |           |              |
| Law 20105 x 'privada pagada'         |             |            |           |              |             |            |           |              |
| cig. price x Law 20105               |             |            |           |              |             |            |           |              |
| Intercept                            | -<br>11.15  | (0.321)*** |           |              | -<br>11.58  | (0.326)*** |           |              |
| Prices, cigarettes (in ln)           |             |            |           |              |             |            |           |              |
| all                                  | -0.36       | (0.020)*** | 0.70      | (0.67, 0.72) | -0.37       | (0.020)*** | 0.69      | (0.67, 0.72) |
| sex: female                          |             |            |           |              | -0.27       | (0.026)*** | 0.76      | (0.73, 0.81) |
| sex: male                            |             |            |           |              | -0.47       | (0.025)*** | 0.63      | (0.60, 0.66) |
| mother's education: primary          |             |            |           |              |             |            |           |              |
| mother's education: secondary        |             |            |           |              |             |            |           |              |
| mother's education: > secondary      |             |            |           |              |             |            |           |              |
| school: pública municipal            |             |            |           |              |             |            |           |              |
| school: privada subvencionada        |             |            |           |              |             |            |           |              |
| school: privada pagada               |             |            |           |              |             |            |           |              |

|                                 |             |            |           |              |             |            |           |              |
|---------------------------------|-------------|------------|-----------|--------------|-------------|------------|-----------|--------------|
| pre Law 20105                   |             |            |           |              |             |            |           |              |
| post Law 20105                  |             |            |           |              |             |            |           |              |
| Law 20105, August 2006          |             |            |           |              |             |            |           |              |
| <b>Model</b>                    | <b>(1)</b>  |            |           |              | <b>(2)</b>  |            |           |              |
| <b>Variables</b>                | <b>Est.</b> | <b>SE</b>  | <b>HR</b> | <b>CI</b>    | <b>Est.</b> | <b>SE</b>  | <b>HR</b> | <b>CI</b>    |
| all                             | -0.16       | (0.012)*** | 0.85      | (0.83, 0.87) | -0.16       | (0.012)*** | 0.85      | (0.83, 0.87) |
| sex: female                     |             |            |           |              | -0.22       | (0.016)*** | 0.80      | (0.78, 0.83) |
| sex: male                       |             |            |           |              | -0.10       | (0.015)*** | 0.90      | (0.88, 0.93) |
| mother's education: primary     |             |            |           |              |             |            |           |              |
| mother's education: secondary   |             |            |           |              |             |            |           |              |
| mother's education: > secondary |             |            |           |              |             |            |           |              |
| school: pública municipal       |             |            |           |              |             |            |           |              |
| school: privada subvencionada   |             |            |           |              |             |            |           |              |
| school: privada pagada          |             |            |           |              |             |            |           |              |

Notes. Est, estimates; SE, standard errors clustered at school-level; HR, hazard ratios; ln, natural log; number of observations, 15,177,836; number of individuals, 181,624; number of failures, 135,019; \*, \*\*, and \*\*\*, significant at 10%, 5%, and 1%, respectively.

**eTable 1. Discrete-time complementary loglog (cloglog) duration models of smoking initiation, 16-19 years old at interview — full results (cont.).**

| Model                                | (3)         |            |           |              | (4)         |            |           |              |
|--------------------------------------|-------------|------------|-----------|--------------|-------------|------------|-----------|--------------|
|                                      | <i>Est.</i> | <i>SE</i>  | <i>HR</i> | <i>CI</i>    | <i>Est.</i> | <i>SE</i>  | <i>HR</i> | <i>CI</i>    |
| Prices (in ln)                       |             |            |           |              |             |            |           |              |
| cigarette                            | -0.36       | (0.039)*** | 0.70      | (0.65, 0.75) | -0.44       | (0.030)*** | 0.64      | (0.61, 0.68) |
| alcohol                              | 1.07        | (0.064)*** | 2.92      | (2.56, 3.29) | 0.95        | (0.068)*** | 2.59      | (2.28, 2.97) |
| Law 20105, August 2006               | -0.10       | (0.025)*** | 0.90      | (0.86, 0.95) | -0.83       | (0.193)*** | 0.44      | (0.30, 0.64) |
| Sex (ref, boys)                      | -0.15       | (0.006)*** | 0.86      | (0.85, 0.87) | -0.15       | (0.006)*** | 0.86      | (0.85, 0.87) |
| Education, mother (ref, primary)     |             |            |           |              |             |            |           |              |
| secondary                            | 0.17        | (0.175)    | 1.19      | (0.85, 0.87) | 0.04        | (0.008)*** | 1.04      | (0.85, 0.87) |
| > secondary                          | -0.09       | (0.202)    | 0.91      | (0.84, 1.67) | 0.03        | (0.009)*** | 1.03      | (1.03, 1.06) |
| School type (ref, pública municipal) |             |            |           |              |             |            |           |              |
| privada subvencionada                | 0.19        | (0.178)    | 1.21      | (0.62, 1.36) | 0.01        | (0.009)    | 1.01      | (1.01, 1.05) |
| privada pagada                       | -0.37       | (0.263)    | 0.69      | (0.86, 1.72) | -0.03       | (0.012)**  | 0.97      | (0.99, 1.03) |
| Region (ref, Santiago)               |             |            |           |              |             |            |           |              |
| Arica, Parinacota, Tarapacá          | -0.18       | (0.019)*** | 0.84      | (0.80, 0.87) | -0.18       | (0.019)*** | 0.84      | (0.80, 0.87) |
| Antofagasta                          | -0.04       | (0.021)**  | 0.96      | (0.92, 1.00) | -0.05       | (0.021)**  | 0.95      | (0.92, 1.00) |
| Atacama                              | -0.05       | (0.025)*   | 0.95      | (0.91, 1.00) | -0.05       | (0.025)**  | 0.95      | (0.91, 1.00) |
| Coquimbo                             | -0.06       | (0.021)*** | 0.94      | (0.91, 0.98) | -0.06       | (0.021)*** | 0.94      | (0.90, 0.98) |
| Valparaíso                           | -0.06       | (0.013)*** | 0.94      | (0.92, 0.97) | -0.06       | (0.013)*** | 0.94      | (0.92, 0.97) |
| O'Higgins                            | -0.11       | (0.020)*** | 0.90      | (0.87, 0.93) | -0.11       | (0.020)*** | 0.90      | (0.86, 0.93) |
| Maule                                | -0.20       | (0.016)*** | 0.82      | (0.79, 0.84) | -0.20       | (0.016)*** | 0.82      | (0.79, 0.84) |
| Biobío                               | -0.12       | (0.013)*** | 0.89      | (0.87, 0.91) | -0.12       | (0.013)*** | 0.89      | (0.87, 0.91) |
| Araucanía                            | -0.13       | (0.021)*** | 0.88      | (0.84, 0.91) | -0.13       | (0.021)*** | 0.88      | (0.84, 0.91) |
| Los Lagos                            | -0.03       | (0.017)*   | 0.97      | (0.94, 1.01) | -0.03       | (0.017)*   | 0.97      | (0.94, 1.00) |
| Aysén                                | 0.03        | (0.039)    | 1.03      | (0.96, 1.11) | 0.03        | (0.038)    | 1.03      | (0.96, 1.12) |
| Magallanes                           | 0.06        | (0.030)*   | 1.06      | (1.00, 1.12) | 0.05        | (0.030)*   | 1.05      | (0.99, 1.12) |
| Duration dependency                  |             |            |           |              |             |            |           |              |

|                                      |             |            |           |              |             |            |           |              |
|--------------------------------------|-------------|------------|-----------|--------------|-------------|------------|-----------|--------------|
| <i>t</i>                             | 0.05        | (0.002)*** |           |              | 0.05        | (0.002)*** |           |              |
| <b>Model</b>                         | <b>(3)</b>  |            |           |              | <b>(4)</b>  |            |           |              |
| <b>Variables</b>                     | <b>Est.</b> | <b>SE</b>  | <b>HR</b> | <b>CI</b>    | <b>Est.</b> | <b>SE</b>  | <b>HR</b> | <b>CI</b>    |
| t^2                                  | 0.00        | (0.000)*** |           |              | 0.00        | (0.000)*** |           |              |
| t^3                                  | -0.00       | (0.000)*** |           |              | -0.00       | (0.000)*** |           |              |
| Interactions                         |             |            |           |              |             |            |           |              |
| cig. price x sex                     | 0           | 0          |           |              |             |            |           |              |
| cig. price x 'secondary'             | -0.03       | (0.039)    |           |              |             |            |           |              |
| cig. price x > 'secondary'           | 0.03        | (0.045)    |           |              |             |            |           |              |
| cig. price x 'privada subvencionada' | -0.04       | (0.040)    |           |              |             |            |           |              |
| cig. price x 'privada pagada'        | 0.08        | (0.059)    |           |              |             |            |           |              |
| Law 20105 x sex                      | 0           | 0          |           |              |             |            |           |              |
| Law 20105 x secondary                | -0.02       | (0.024)    |           |              |             |            |           |              |
| Law 20105 x > secondary              | -0.08       | (0.029)*** |           |              |             |            |           |              |
| Law 20105 x 'privada subvencionada'  | -0.03       | (0.025)    |           |              |             |            |           |              |
| Law 20105 x 'privada pagada'         | -0.09       | (0.039)**  |           |              |             |            |           |              |
| cig. price x Law 20105               | 0           | 0          |           |              | 0.14        | (0.041)*** |           |              |
| Intercept                            | -11.19      | (0.353)*** |           |              | -10.29      | (0.376)*** |           |              |
| Prices, cigarettes (in ln)           |             |            |           |              |             |            |           |              |
| all                                  | -0.36       | (0.020)*** | 0.70      | (0.67, 0.72) | -0.40       | (0.022)*** | 0.67      | (0.65, 0.70) |
| sex: female                          |             |            |           |              |             |            |           |              |
| sex: male                            |             |            |           |              |             |            |           |              |
| mother's education: primary          | -0.37       | (0.035)*** | 0.69      | (0.65, 0.74) |             |            |           |              |
| mother's education: secondary        | -0.40       | (0.027)*** | 0.67      | (0.64, 0.71) |             |            |           |              |
| mother's education: > secondary      | -0.32       | (0.030)*** | 0.73      | (0.69, 0.77) |             |            |           |              |
| school: pública municipal            | -0.37       | (0.029)*** | 0.69      | (0.66, 0.74) |             |            |           |              |
| school: privada subvencionada        | -0.40       | (0.028)*** | 0.67      | (0.64, 0.71) |             |            |           |              |
| school: privada pagada               | -0.26       | (0.050)*** | 0.77      | (0.70, 0.85) |             |            |           |              |

|                                 |             |            |           |              |             |            |           |              |
|---------------------------------|-------------|------------|-----------|--------------|-------------|------------|-----------|--------------|
| pre Law 20105                   |             |            |           |              | -0.44       | (0.030)*** | 0.64      | (0.61, 0.68) |
| post Law 20105                  |             |            |           |              | -0.30       | (0.027)*** | 0.74      | (0.70, 0.78) |
| <b>Model</b>                    | <b>(3)</b>  |            |           |              | <b>(4)</b>  |            |           |              |
| <b>Variables</b>                | <b>Est.</b> | <b>SE</b>  | <b>HR</b> | <b>CI</b>    | <b>Est.</b> | <b>SE</b>  | <b>HR</b> | <b>CI</b>    |
| Law 20105, August 2006          |             |            |           |              |             |            |           |              |
| all                             | -0.16       | (0.012)*** | 0.85      | (0.83, 0.87) | -0.19       | (0.014)*** | 0.83      | (0.81, 0.85) |
| sex: female                     |             |            |           |              |             |            |           |              |
| sex: male                       |             |            |           |              |             |            |           |              |
| mother's education: primary     | -0.11       | (0.022)*** | 0.90      | (0.85, 0.93) |             |            |           |              |
| mother's education: secondary   | -0.14       | (0.016)*** | 0.87      | (0.84, 0.90) |             |            |           |              |
| mother's education: > secondary | -0.22       | (0.019)*** | 0.80      | (0.77, 0.83) |             |            |           |              |
| school: pública municipal       | -0.13       | (0.019)*** | 0.88      | (0.85, 0.92) |             |            |           |              |
| school: privada subvencionada   | -0.16       | (0.016)*** | 0.85      | (0.82, 0.88) |             |            |           |              |
| school: privada pagada          | -0.25       | (0.033)*** | 0.78      | (0.73, 0.83) |             |            |           |              |

Notes. Est, estimates; SE, standard errors clustered at school-level; HR, hazard ratios; ln, natural log; number of observations, 15,177,836; number of individuals, 181,624; number of failures, 135,019; \*, \*\*, and \*\*\*, significant at 10%, 5%, and 1%, respectively.

**eTable 1. Discrete-time complementary loglog (cloglog) duration models of smoking initiation, 16-19 years old at interview — full results (cont.).**

| Model                                | (5)         |            |           |              |
|--------------------------------------|-------------|------------|-----------|--------------|
|                                      | <i>Est.</i> | <i>SE</i>  | <i>HR</i> | <i>CI</i>    |
| Variables                            |             |            |           |              |
| Prices (in ln)                       |             |            |           |              |
| cigarette                            | -0.35       | (0.047)*** | 0.70      | (0.64, 0.77) |
| alcohol                              | 0.95        | (0.068)*** | 2.59      | (2.26, 2.95) |
| Law 20105, August 2006               | -0.87       | (0.196)*** | 0.42      | (0.28, 0.61) |
| Sex (ref, boys)                      | 0.76        | (0.143)*** | 2.14      | (1.61, 2.82) |
| Education, mother (ref, primary)     |             |            |           |              |
| secondary                            | 0.16        | (0.174)    | 1.17      | (1.61, 2.82) |
| > secondary                          | -0.02       | (0.202)    | 0.98      | (0.84, 1.66) |
| School type (ref, pública municipal) |             |            |           |              |
| privada subvencionada                | 0.20        | (0.177)    | 1.22      | (0.66, 1.45) |
| privada pagada                       | -0.46       | (0.263)*   | 0.63      | (0.87, 1.73) |
| Region (ref, Santiago)               |             |            |           |              |
| Arica, Parinacota, Tarapacá          | -0.18       | (0.019)*** | 0.84      | (0.80, 0.87) |
| Antofagasta                          | -0.04       | (0.021)**  | 0.96      | (0.92, 1.00) |
| Atacama                              | -0.05       | (0.025)*   | 0.95      | (0.91, 1.00) |
| Coquimbo                             | -0.06       | (0.021)*** | 0.94      | (0.91, 0.98) |
| Valparaíso                           | -0.06       | (0.013)*** | 0.94      | (0.92, 0.97) |
| O'Higgins                            | -0.11       | (0.020)*** | 0.90      | (0.86, 0.93) |
| Maule                                | -0.20       | (0.016)*** | 0.82      | (0.79, 0.84) |
| Biobío                               | -0.12       | (0.013)*** | 0.89      | (0.87, 0.91) |
| Araucanía                            | -0.13       | (0.021)*** | 0.88      | (0.84, 0.91) |
| Los Lagos                            | -0.03       | (0.017)*   | 0.97      | (0.94, 1.00) |
| Aysén                                | 0.03        | (0.039)    | 1.03      | (0.96, 1.12) |
| Magallanes                           | 0.06        | (0.030)*   | 1.06      | (1.00, 1.12) |
| Duration dependency                  |             |            |           |              |

|                                      |             |            |           |              |
|--------------------------------------|-------------|------------|-----------|--------------|
| <i>t</i>                             | 0.05        | (0.002)*** |           |              |
| <b>Model</b>                         | <b>(5)</b>  |            |           |              |
| <b>Variables</b>                     | <b>Est.</b> | <b>SE</b>  | <b>HR</b> | <b>CI</b>    |
| t^2                                  | 0.00        | (0.000)*** |           |              |
| t^3                                  | -0.00       | (0.000)*** |           |              |
| Interactions                         |             |            |           |              |
| cig. price x sex                     | -0.20       | (0.032)*** |           |              |
| cig. price x 'secondary'             | -0.02       | (0.039)    |           |              |
| cig. price x > 'secondary'           | 0.02        | (0.045)    |           |              |
| cig. price x 'privada subvencionada' | -0.04       | (0.040)    |           |              |
| cig. price x 'privada pagada'        | 0.10        | (0.059)*   |           |              |
| Law 20105 x sex                      | 0.12        | (0.020)*** |           |              |
| Law 20105 x secondary                | -0.03       | (0.025)    |           |              |
| Law 20105 x > secondary              | -0.08       | (0.029)*** |           |              |
| Law 20105 x 'privada subvencionada'  | -0.03       | (0.025)    |           |              |
| Law 20105 x 'privada pagada'         | -0.10       | (0.040)**  |           |              |
| cig. price x Law 20105               | 0.15        | (0.041)*** |           |              |
| Intercept                            | -10.72      | (0.407)*** |           |              |
| Prices, cigarettes (in ln)           |             |            |           |              |
| all                                  | -0.40       | (0.022)*** | 0.67      | (0.64, 0.70) |
| sex: female                          | -0.30       | (0.027)*** | 0.74      | (0.70, 0.78) |
| sex: male                            | -0.50       | (0.027)*** | 0.61      | (0.57, 0.64) |
| mother's education: primary          | -0.41       | (0.036)*** | 0.66      | (0.62, 0.71) |
| mother's education: secondary        | -0.44       | (0.028)*** | 0.64      | (0.61, 0.68) |
| mother's education: > secondary      | -0.36       | (0.031)*** | 0.70      | (0.66, 0.74) |
| school: pública municipal            | -0.41       | (0.031)*** | 0.66      | (0.63, 0.71) |
| school: privada subvencionada        | -0.44       | (0.030)*** | 0.64      | (0.61, 0.68) |
| school: privada pagada               | -0.30       | (0.049)*** | 0.74      | (0.67, 0.82) |
| pre Law 20105                        | -0.45       | (0.030)*** | 0.64      | (0.60, 0.67) |

|                                                                                                                                                                                                                                                                          |             |            |           |              |
|--------------------------------------------------------------------------------------------------------------------------------------------------------------------------------------------------------------------------------------------------------------------------|-------------|------------|-----------|--------------|
| post Law 20105                                                                                                                                                                                                                                                           | -0.30       | (0.027)*** | 0.74      | (0.70, 0.78) |
| <b>Model</b>                                                                                                                                                                                                                                                             | <b>(5)</b>  |            |           |              |
| <b>Variables</b>                                                                                                                                                                                                                                                         | <b>Est.</b> | <b>SE</b>  | <b>HR</b> | <b>CI</b>    |
| Law 20105, August 2006                                                                                                                                                                                                                                                   |             |            |           |              |
| all                                                                                                                                                                                                                                                                      | -0.19       | (0.014)*** | 0.83      | (0.81, 0.85) |
| sex: female                                                                                                                                                                                                                                                              | -0.25       | (0.018)*** | 0.78      | (0.76, 0.81) |
| sex: male                                                                                                                                                                                                                                                                | -0.13       | (0.017)*** | 0.88      | (0.85, 0.91) |
| mother's education: primary                                                                                                                                                                                                                                              | -0.15       | (0.024)*** | 0.86      | (0.83, 0.91) |
| mother's education: secondary                                                                                                                                                                                                                                            | -0.17       | (0.018)*** | 0.84      | (0.82, 0.88) |
| mother's education: > secondary                                                                                                                                                                                                                                          | -0.24       | (0.020)*** | 0.79      | (0.76, 0.82) |
| school: pública municipal                                                                                                                                                                                                                                                | -0.15       | (0.021)*** | 0.86      | (0.83, 0.90) |
| school: privada subvencionada                                                                                                                                                                                                                                            | -0.19       | (0.018)*** | 0.83      | (0.80, 0.86) |
| school: privada pagada                                                                                                                                                                                                                                                   | -0.28       | (0.035)*** | 0.76      | (0.71, 0.81) |
| Notes. Est, estimates; SE, standard errors clustered at school-level; HR, hazard ratios; ln, natural log; number of observations, 15,177,836; number of individuals, 181,624; number of failures, 135,019; *, **, and ***, significant at 10%, 5%, and 1%, respectively. |             |            |           |              |

**eTable 2. Discrete-time complementary loglog (cloglog) duration models of smoking initiation, 16-19 years old at interview — prices**

| Model                                | (1)   |            |      |              | (2)   |            |      |              |
|--------------------------------------|-------|------------|------|--------------|-------|------------|------|--------------|
|                                      | Est.  | SE         | HR   | CI           | Est.  | SE         | HR   | CI           |
| Prices (in <i>ln</i> )               |       |            |      |              |       |            |      |              |
| cigarette                            | -0.55 | (0.015)*** | 0.58 | (0.56, 0.59) | -0.53 | (0.018)*** | 0.59 | (0.57, 0.61) |
| alcohol                              | 1.37  | (0.063)*** | 3.94 | (3.49, 4.47) | 1.37  | (0.063)*** | 3.94 | (3.49, 4.47) |
| Sex (ref, boys)                      | -0.15 | (0.006)*** | 0.86 | (0.85, 0.87) | 0.10  | (0.097)    | 1.11 | (0.91, 1.34) |
| Education, mother (ref, primary)     |       |            |      |              |       |            |      |              |
| secondary                            | 0.04  | (0.008)*** | 1.04 | (1.03, 1.06) | 0.04  | (0.008)*** | 1.04 | (1.03, 1.06) |
| > secondary                          | 0.03  | (0.009)*** | 1.03 | (1.01, 1.05) | 0.03  | (0.009)*** | 1.03 | (1.01, 1.05) |
| School type (ref, pública municipal) |       |            |      |              |       |            |      |              |
| privada subvencionada                | 0.01  | (0.009)    | 1.01 | (0.99, 1.03) | 0.01  | (0.009)    | 1.01 | (0.99, 1.03) |
| privada pagada                       | -0.03 | (0.012)*** | 0.97 | (0.94, 0.99) | -0.03 | (0.012)*** | 0.97 | (0.94, 0.99) |
| Region (ref, Santiago)               |       |            |      |              |       |            |      |              |
| Arica, Parinacota, Tarapacá          | -0.18 | (0.019)*** | 0.84 | (0.80, 0.87) | -0.18 | (0.019)*** | 0.84 | (0.80, 0.87) |
| Antofagasta                          | -0.05 | (0.022)**  | 0.95 | (0.91, 0.99) | -0.05 | (0.022)**  | 0.95 | (0.91, 0.99) |
| Atacama                              | -0.05 | (0.025)**  | 0.95 | (0.90, 1.00) | -0.05 | (0.025)**  | 0.95 | (0.90, 1.00) |
| Coquimbo                             | -0.06 | (0.021)*** | 0.94 | (0.90, 0.98) | -0.06 | (0.021)*** | 0.94 | (0.90, 0.98) |
| Valparaíso                           | -0.06 | (0.013)*** | 0.94 | (0.92, 0.97) | -0.06 | (0.013)*** | 0.94 | (0.92, 0.97) |
| O'Higgins                            | -0.12 | (0.020)*** | 0.89 | (0.86, 0.92) | -0.12 | (0.020)*** | 0.89 | (0.86, 0.92) |
| Maule                                | -0.21 | (0.017)*** | 0.81 | (0.79, 0.84) | -0.21 | (0.017)*** | 0.81 | (0.79, 0.84) |

|                                       |             |            |           |              |             |            |           |              |
|---------------------------------------|-------------|------------|-----------|--------------|-------------|------------|-----------|--------------|
| Biobío                                | -0.12       | (0.013)*** | 0.89      | (0.86, 0.91) | -0.12       | (0.013)*** | 0.89      | (0.86, 0.91) |
| <b>Model</b>                          | <b>(1)</b>  |            |           |              | <b>(2)</b>  |            |           |              |
| <b>Variables</b>                      | <b>Est.</b> | <b>SE</b>  | <b>HR</b> | <b>CI</b>    | <b>Est.</b> | <b>SE</b>  | <b>HR</b> | <b>CI</b>    |
| Araucanía                             | -0.14       | (0.021)*** | 0.87      | (0.84, 0.91) | -0.14       | (0.021)*** | 0.87      | (0.84, 0.91) |
| Los Lagos                             | -0.04       | (0.017)**  | 0.96      | (0.93, 1.00) | -0.04       | (0.017)**  | 0.96      | (0.93, 1.00) |
| Aysén                                 | 0.02        | (0.040)    | 1.02      | (0.95, 1.11) | 0.02        | (0.040)    | 1.02      | (0.95, 1.11) |
| Magallanes                            | 0.05        | (0.031)    | 1.05      | (0.99, 1.11) | 0.05        | (0.031)    | 1.05      | (0.99, 1.11) |
| Duration dependency                   |             |            |           |              |             |            |           |              |
| <i>t</i>                              | 0.05        | (0.002)*** |           |              | 0.05        | (0.002)*** |           |              |
| <i>t</i> <sup>2</sup>                 | 0.00        | (0.000)*** |           |              | 0.00        | (0.000)*** |           |              |
| <i>t</i> <sup>3</sup>                 | -0.00       | (0.000)*** |           |              | -0.00       | (0.000)*** |           |              |
| Interactions                          |             |            |           |              |             |            |           |              |
| cig. price x sex                      |             |            |           |              | -0.05       | (0.021)**  |           |              |
| cig. price x 'secondary'              |             |            |           |              |             |            |           |              |
| cig. price x > 'secondary'            |             |            |           |              |             |            |           |              |
| cig. price x 'privada subvencionada'  |             |            |           |              |             |            |           |              |
| cig. price x 'privada pagada'         |             |            |           |              |             |            |           |              |
| Intercept                             | 11.78       | (0.325)*** |           |              | -11.90      | (0.326)*** |           |              |
| Own-price elasticities for cigarettes |             |            |           |              |             |            |           |              |
| sex: female                           |             |            |           |              | -0.52       | (0.018)*** |           |              |
| sex: male                             |             |            |           |              | -0.58       | (0.018)*** |           |              |
| mother's education: primary           |             |            |           |              |             |            |           |              |
| mother's education: secondary         |             |            |           |              |             |            |           |              |
| mother's education: > secondary       |             |            |           |              |             |            |           |              |
| school: pública municipal             |             |            |           |              |             |            |           |              |
| school: privada subvencionada         |             |            |           |              |             |            |           |              |
| school: privada pagada                |             |            |           |              |             |            |           |              |

Notes. Est, estimates; SE, standard errors clustered at school-level; HR, hazard ratios; ln, natural log; number of observations, 15,177,836; number of individuals, 181,624; number of failures, 135,019; \*, \*\*, and \*\*\*, significant at 10%, 5%, and 1%, respectively.

**eTable 2. Discrete-time complementary loglog (cloglog) duration models of smoking initiation, 16-19 years old at interview — prices (cont.)**

| Model                                | (3)   |            |          |              | (4)   |            |          |              |
|--------------------------------------|-------|------------|----------|--------------|-------|------------|----------|--------------|
|                                      | Est.  | SE         | HR       | CI           | Est.  | SE         | HR       | CI           |
| Prices (in ln)                       |       |            |          |              |       |            |          |              |
| cigarette                            | -0.49 | (0.024)*** | 0.6<br>1 | (0.58, 0.64) | -0.51 | (0.020)*** | 0.6<br>0 | (0.58, 0.63) |
| alcohol                              | 1.38  | (0.063)*** | 3.9<br>7 | (3.50, 4.50) | 1.37  | (0.063)*** | 3.9<br>4 | (3.49, 4.47) |
| Sex (ref, boys)                      | -0.15 | (0.006)*** | 0.8<br>6 | (0.85, 0.87) | -0.15 | (0.006)*** | 0.8<br>6 | (0.85, 0.87) |
| Education, mother (ref, primary)     |       |            |          |              |       |            |          |              |
| secondary                            | 0.34  | (0.118)*** | 1.4<br>0 | (1.12, 1.77) | 0.04  | (0.008)*** | 1.0<br>4 | (1.03, 1.06) |
| > secondary                          | 0.46  | (0.134)*** | 1.5<br>8 | (1.22, 2.06) | 0.03  | (0.009)*** | 1.0<br>3 | (1.01, 1.05) |
| School type (ref, pública municipal) |       |            |          |              |       |            |          |              |
| privada subvencionada                | 0.01  | (0.009)    | 1.0<br>1 | (0.99, 1.03) | 0.41  | (0.127)*** | 1.5<br>1 | (1.17, 1.93) |
| privada pagada                       | -0.03 | (0.012)*** | 0.9<br>7 | (0.95, 0.99) | 0.20  | (0.162)    | 1.2<br>2 | (0.89, 1.68) |
| Region (ref, Santiago)               |       |            |          |              |       |            |          |              |
| Arica, Parinacota, Tarapacá          | -0.18 | (0.019)*** | 0.8<br>4 | (0.80, 0.87) | -0.18 | (0.019)*** | 0.8<br>4 | (0.80, 0.87) |
| Antofagasta                          | -0.05 | (0.022)**  | 0.9<br>5 | (0.91, 0.99) | -0.05 | (0.022)**  | 0.9<br>5 | (0.91, 1.00) |
| Atacama                              | -0.05 | (0.025)**  | 0.9<br>5 | (0.90, 1.00) | -0.05 | (0.025)**  | 0.9<br>5 | (0.90, 1.00) |
| Coquimbo                             | -0.06 | (0.021)*** | 0.9<br>4 | (0.90, 0.98) | -0.06 | (0.021)*** | 0.9<br>4 | (0.90, 0.98) |
| Valparaíso                           | -0.06 | (0.013)*** | 0.9<br>4 | (0.92, 0.97) | -0.06 | (0.013)*** | 0.9<br>4 | (0.92, 0.97) |
| O'Higgins                            | -0.12 | (0.020)*** | 0.8<br>9 | (0.86, 0.92) | -0.12 | (0.020)*** | 0.8<br>9 | (0.86, 0.93) |
| Maule                                | -0.21 | (0.017)*** | 0.8<br>1 | (0.79, 0.84) | -0.21 | (0.017)*** | 0.8<br>1 | (0.79, 0.84) |

|                                       |             |            |           |              |             |            |           |              |
|---------------------------------------|-------------|------------|-----------|--------------|-------------|------------|-----------|--------------|
| Biobío                                | -0.12       | (0.013)*** | 0.89      | (0.86, 0.91) | -0.12       | (0.013)*** | 0.89      | (0.86, 0.91) |
| Araucanía                             | -0.14       | (0.021)*** | 0.87      | (0.84, 0.91) | -0.14       | (0.021)*** | 0.87      | (0.84, 0.91) |
| Los Lagos                             | -0.04       | (0.017)**  | 0.96      | (0.93, 1.00) | -0.04       | (0.018)**  | 0.96      | (0.93, 1.00) |
| Aysén                                 | 0.02        | (0.040)    | 1.02      | (0.95, 1.11) | 0.02        | (0.040)    | 1.02      | (0.95, 1.11) |
| Magallanes                            | 0.05        | (0.031)    | 1.05      | (0.99, 1.12) | 0.05        | (0.031)    | 1.05      | (0.99, 1.12) |
| Duration dependency                   |             |            |           |              |             |            |           |              |
| <i>t</i>                              | 0.05        | (0.002)*** |           |              | 0.05        | (0.002)*** |           |              |
| <i>t</i> <sup>2</sup>                 | 0.00        | (0.000)*** |           |              | 0.00        | (0.000)*** |           |              |
| <i>t</i> <sup>3</sup>                 | -0.00       | (0.000)*** |           |              | -0.00       | (0.000)*** |           |              |
| Interactions                          |             |            |           |              |             |            |           |              |
| cig. price x sex                      |             |            |           |              |             |            |           |              |
| cig. price x 'secondary'              | -0.07       | (0.025)**  |           |              |             |            |           |              |
| <b>Model</b>                          | <b>(3)</b>  |            |           |              | <b>(4)</b>  |            |           |              |
| <b>Variables</b>                      | <b>Est.</b> | <b>SE</b>  | <b>HR</b> | <b>CI</b>    | <b>Est.</b> | <b>SE</b>  | <b>HR</b> | <b>CI</b>    |
| cig. price x > 'secondary'            | -0.09       | (0.029)*** |           |              |             |            |           |              |
| cig. price x 'privada subvencionada'  |             |            |           |              | -0.09       | (0.027)*** |           |              |
| cig. price x 'privada pagada'         |             |            |           |              | -0.05       | (0.035)    |           |              |
| Intercept                             | -12.09      | (0.336)*** |           |              | -11.99      | (0.331)*** |           |              |
| Own-price elasticities for cigarettes |             |            |           |              |             |            |           |              |
| sex: female                           |             |            |           |              |             |            |           |              |
| sex: male                             |             |            |           |              |             |            |           |              |
| mother's education: primary           | -0.49       | (0.024)*** |           |              |             |            |           |              |
| mother's education: secondary         | -0.55       | (0.019)*** |           |              |             |            |           |              |
| mother's education: > secondary       | -0.58       | (0.020)*** |           |              |             |            |           |              |
| school: pública municipal             |             |            |           |              | -0.50       | (0.020)*** |           |              |
| school: privada subvencionada         |             |            |           |              | -0.59       | (0.021)*** |           |              |

|                        |  |  |  |  |       |                        |  |  |
|------------------------|--|--|--|--|-------|------------------------|--|--|
| school: privada pagada |  |  |  |  | -0.55 | (0.030) <sup>***</sup> |  |  |
|------------------------|--|--|--|--|-------|------------------------|--|--|

Notes. Est, estimates; SE, standard errors clustered at school-level; HR, hazard ratios; ln, natural log; number of observations, 15,177,836; number of individuals, 181,624; number of failures, 135,019; \*, \*\*, and \*\*\*, significant at 10%, 5%, and 1%, respectively.

**eTable 2. Discrete-time complementary loglog (cloglog) duration models of smoking initiation, 16-19 years old at interview — prices (cont.)**

| Model                                | (5)   |                        |      |              |
|--------------------------------------|-------|------------------------|------|--------------|
| Variables                            | Est.  | SE                     | HR   | CI           |
| Prices (in <i>ln</i> )               |       |                        |      |              |
| cigarette                            | -0.44 | (0.028) <sup>***</sup> | 0.64 | (0.61, 0.68) |
| alcohol                              | 1.38  | (0.063) <sup>***</sup> | 3.97 | (3.50, 4.49) |
| Sex (ref, boys)                      | 0.09  | (0.098)                | 1.09 | (0.90, 1.32) |
| Education, mother (ref, primary)     |       |                        |      |              |
| secondary                            | 0.30  | (0.119) <sup>**</sup>  | 1.35 | (1.07, 1.70) |
| > secondary                          | 0.41  | (0.138) <sup>***</sup> | 1.51 | (1.15, 1.97) |
| School type (ref, pública municipal) |       |                        |      |              |
| privada subvencionada                | 0.36  | (0.128) <sup>***</sup> | 1.43 | (1.12, 1.85) |
| privada pagada                       | 0.06  | (0.169)                | 1.06 | (0.77, 1.48) |
| Region (ref, Santiago)               |       |                        |      |              |
| Arica, Parinacota, Tarapacá          | -0.18 | (0.019) <sup>***</sup> | 0.84 | (0.80, 0.87) |
| Antofagasta                          | -0.05 | (0.022) <sup>**</sup>  | 0.95 | (0.91, 0.99) |
| Atacama                              | -0.05 | (0.025) <sup>**</sup>  | 0.95 | (0.90, 1.00) |
| Coquimbo                             | -0.06 | (0.021) <sup>***</sup> | 0.94 | (0.90, 0.98) |
| Valparaíso                           | -0.06 | (0.013) <sup>***</sup> | 0.94 | (0.92, 0.97) |
| O'Higgins                            | -0.12 | (0.020) <sup>***</sup> | 0.89 | (0.86, 0.93) |
| Maule                                | -0.21 | (0.017) <sup>***</sup> | 0.81 | (0.79, 0.84) |
| Biobío                               | -0.12 | (0.013) <sup>***</sup> | 0.89 | (0.86, 0.91) |
| Araucanía                            | -0.14 | (0.021) <sup>***</sup> | 0.87 | (0.84, 0.91) |
| Los Lagos                            | -0.04 | (0.017) <sup>**</sup>  | 0.96 | (0.93, 1.00) |
| Aysén                                | 0.02  | (0.040)                | 1.02 | (0.95, 1.11) |
| Magallanes                           | 0.05  | (0.031)                | 1.05 | (0.99, 1.12) |
| Duration dependency                  |       |                        |      |              |
| <i>t</i>                             | 0.05  | (0.002) <sup>***</sup> |      |              |
| <i>t</i> <sup>2</sup>                | 0.00  | (0.000) <sup>***</sup> |      |              |
| <i>t</i> <sup>3</sup>                | -0.00 | (0.000) <sup>***</sup> |      |              |
| Interactions                         |       |                        |      |              |

|                                                                                                                                                                                                                                                                          |             |            |           |           |
|--------------------------------------------------------------------------------------------------------------------------------------------------------------------------------------------------------------------------------------------------------------------------|-------------|------------|-----------|-----------|
| cig. price x sex                                                                                                                                                                                                                                                         | -0.05       | (0.021)**  |           |           |
| cig. price x 'secondary'                                                                                                                                                                                                                                                 | -0.06       | (0.026)**  |           |           |
| <b>Model</b>                                                                                                                                                                                                                                                             | <b>(5)</b>  |            |           |           |
| <b>Variables</b>                                                                                                                                                                                                                                                         | <b>Est.</b> | <b>SE</b>  | <b>HR</b> | <b>CI</b> |
| cig. price x > 'secondary'                                                                                                                                                                                                                                               | -0.08       | (0.029)*** |           |           |
| cig. price x 'privada subvencionada'                                                                                                                                                                                                                                     | -0.08       | (0.027)*** |           |           |
| cig. price x 'privada pagada'                                                                                                                                                                                                                                            | -0.02       | (0.036)    |           |           |
| Intercept                                                                                                                                                                                                                                                                | -12.33      | (0.340)*** |           |           |
| Own-price elasticities for cigarettes                                                                                                                                                                                                                                    |             |            |           |           |
| sex: female                                                                                                                                                                                                                                                              | -0.52       | (0.018)*** |           |           |
| sex: male                                                                                                                                                                                                                                                                | -0.58       | (0.018)*** |           |           |
| mother's education: primary                                                                                                                                                                                                                                              | -0.49       | (0.024)*** |           |           |
| mother's education: secondary                                                                                                                                                                                                                                            | -0.56       | (0.019)*** |           |           |
| mother's education: > secondary                                                                                                                                                                                                                                          | -0.58       | (0.020)*** |           |           |
| school: pública municipal                                                                                                                                                                                                                                                | -0.50       | (0.020)*** |           |           |
| school: privada subvencionada                                                                                                                                                                                                                                            | -0.59       | (0.021)*** |           |           |
| school: privada pagada                                                                                                                                                                                                                                                   | -0.55       | (0.030)*** |           |           |
| Notes. Est, estimates; SE, standard errors clustered at school-level; HR, hazard ratios; ln, natural log; number of observations, 15,177,836; number of individuals, 181,624; number of failures, 135,019; *, **, and ***, significant at 10%, 5%, and 1%, respectively. |             |            |           |           |

**eTable 3. Discrete-time complementary loglog (cloglog) duration models of smoking initiation, 16-19 years old at interview — Law 20105**

| Model                                | (1)           |            |          |              | (2)           |            |          |              |
|--------------------------------------|---------------|------------|----------|--------------|---------------|------------|----------|--------------|
|                                      | Est.          | SE         | HR       | CI           | Est.          | SE         | HR       | CI           |
| Law 20105, August 2006               | -<br>0.3<br>8 | (0.009)*** | 0.6<br>8 | (0.67, 0.69) | -<br>0.3<br>9 | (0.011)*** | 0.6<br>8 | (0.66, 0.69) |
| Sex (ref, boys)                      | -<br>0.1<br>5 | (0.006)*** | 0.8<br>6 | (0.85, 0.87) | -<br>0.1<br>6 | (0.008)*** | 0.8<br>5 | (0.84, 0.87) |
| Education, mother (ref, primary)     |               |            |          |              |               |            |          |              |
| secondary                            | 0.0<br>3      | (0.008)*** | 1.0<br>3 | (1.02, 1.05) | 0.0<br>3      | (0.008)*** | 1.0<br>3 | (1.02, 1.05) |
| > secondary                          | 0.0<br>1      | (0.009)    | 1.0<br>1 | (1.00, 1.03) | 0.0<br>1      | (0.009)    | 1.0<br>1 | (1.00, 1.03) |
| School type (ref, pública municipal) |               |            |          |              |               |            |          |              |
| privada subvencionada                | 0.0<br>0      | (0.009)    | 1.0<br>0 | (0.99, 1.02) | 0.0<br>0      | (0.009)    | 1.0<br>0 | (0.99, 1.02) |
| privada pagada                       | -<br>0.0<br>2 | (0.012)    | 0.9<br>8 | (0.96, 1.01) | -<br>0.0<br>1 | (0.012)    | 0.9<br>9 | (0.96, 1.01) |
| Region (ref, Santiago)               |               |            |          |              |               |            |          |              |
| Arica, Parinacota, Tarapacá          | -<br>0.1<br>8 | (0.020)*** | 0.8<br>4 | (0.80, 0.86) | -<br>0.1<br>8 | (0.020)*** | 0.8<br>4 | (0.80, 0.86) |
| Antofagasta                          | -<br>0.0<br>5 | (0.021)**  | 0.9<br>5 | (0.91, 0.99) | -<br>0.0<br>5 | (0.021)**  | 0.9<br>5 | (0.91, 0.99) |
| Atacama                              | -<br>0.0<br>5 | (0.026)*   | 0.9<br>5 | (0.90, 1.00) | -<br>0.0<br>5 | (0.026)*   | 0.9<br>5 | (0.90, 1.00) |
| Coquimbo                             | -<br>0.0<br>6 | (0.021)*** | 0.9<br>4 | (0.90, 0.98) | -<br>0.0<br>6 | (0.021)*** | 0.9<br>4 | (0.90, 0.98) |
| Valparaíso                           | -<br>0.0<br>6 | (0.013)*** | 0.9<br>4 | (0.92, 0.97) | -<br>0.0<br>6 | (0.013)*** | 0.9<br>4 | (0.92, 0.97) |

|                                     |               |            |           |              |               |            |           |              |
|-------------------------------------|---------------|------------|-----------|--------------|---------------|------------|-----------|--------------|
| O'Higgins                           | -<br>0.1<br>1 | (0.020)*** | 0.9<br>0  | (0.86, 0.93) | -<br>0.1<br>1 | (0.020)*** | 0.9<br>0  | (0.86, 0.93) |
| Maule                               | -<br>0.2<br>1 | (0.016)*** | 0.8<br>1  | (0.78, 0.84) | -<br>0.2<br>1 | (0.016)*** | 0.8<br>1  | (0.78, 0.84) |
| Biobío                              | -<br>0.1<br>2 | (0.013)*** | 0.8<br>9  | (0.86, 0.91) | -<br>0.1<br>2 | (0.013)*** | 0.8<br>9  | (0.86, 0.91) |
| Araucanía                           | -<br>0.1<br>4 | (0.020)*** | 0.8<br>7  | (0.83, 0.90) | -<br>0.1<br>4 | (0.020)*** | 0.8<br>7  | (0.83, 0.90) |
| Los Lagos                           | -<br>0.0<br>4 | (0.017)**  | 0.9<br>6  | (0.93, 1.00) | -<br>0.0<br>4 | (0.017)**  | 0.9<br>6  | (0.93, 1.00) |
| Aysén                               | 0.0<br>3      | (0.037)    | 1.0<br>3  | (0.96, 1.11) | 0.0<br>3      | (0.037)    | 1.0<br>3  | (0.96, 1.11) |
| Magallanes                          | 0.0<br>5      | (0.030)*   | 1.0<br>5  | (0.99, 1.12) | 0.0<br>5      | (0.030)*   | 1.0<br>5  | (0.99, 1.12) |
| Duration dependency                 |               |            |           |              |               |            |           |              |
| <b>Model</b>                        | <b>(1)</b>    |            |           |              | <b>(2)</b>    |            |           |              |
| <b>Variables</b>                    | <b>Est.</b>   | <b>SE</b>  | <b>HR</b> | <b>CI</b>    | <b>Est.</b>   | <b>SE</b>  | <b>HR</b> | <b>CI</b>    |
| <i>t</i>                            | 0.0<br>5      | (0.002)*** | 1.0<br>5  | (1.05, 1.06) | 0.0<br>5      | (0.002)*** | 1.0<br>5  | (1.05, 1.06) |
| <i>t</i> <sup>2</sup>               | 0.0<br>0      | (0.000)*** | 1.0<br>0  | (1.00, 1.00) | 0.0<br>0      | (0.000)*** | 1.0<br>0  | (1.00, 1.00) |
| <i>t</i> <sup>3</sup>               | -<br>0.0<br>0 | (0.000)*** | 1.0<br>0  | (1.00, 1.00) | -<br>0.0<br>0 | (0.000)*** | 1.0<br>0  | (1.00, 1.00) |
| Interactions                        |               |            |           |              |               |            |           |              |
| Law 20105 x sex                     |               |            |           |              | 0.0<br>2      | (0.013)*   | 1.0<br>2  | (1.00, 1.05) |
| Law 20105 x secondary               |               |            |           |              |               |            |           |              |
| Law 20105 x > secondary             |               |            |           |              |               |            |           |              |
| Law 20105 x 'privada subvencionada' |               |            |           |              |               |            |           |              |
| Law 20105 x 'privada pagada'        |               |            |           |              |               |            |           |              |
| Intercept                           | -<br>7.7<br>5 | (0.036)*** | 0.0<br>0  | (0.00, 0.00) | -<br>7.7<br>4 | (0.036)*** | 0.0<br>0  | (0.00, 0.00) |

|                                 |  |  |  |  |               |            |          |              |
|---------------------------------|--|--|--|--|---------------|------------|----------|--------------|
| Law 20105, hazard ratios        |  |  |  |  |               |            |          |              |
| all                             |  |  |  |  |               |            |          |              |
| sex: female                     |  |  |  |  | -<br>0.3<br>9 | (0.011)*** | 0.6<br>8 | (0.66, 0.69) |
| sex: male                       |  |  |  |  | -<br>0.3<br>7 | (0.011)*** | 0.6<br>9 | (0.68, 0.71) |
| mother's education: primary     |  |  |  |  |               |            |          |              |
| mother's education: secondary   |  |  |  |  |               |            |          |              |
| mother's education: > secondary |  |  |  |  |               |            |          |              |
| school: pública municipal       |  |  |  |  |               |            |          |              |
| school: privada subvencionada   |  |  |  |  |               |            |          |              |
| school: privada pagada          |  |  |  |  |               |            |          |              |

Notes. Est, estimates; SE, standard errors clustered at school-level; HR, hazard ratios; ln, natural log; number of observations, 15,177,836; number of individuals, 181,624; number of failures, 135,019; \*, \*\*, and \*\*\*, significant at 10%, 5%, and 1%, respectively.

**eTable 3. Discrete-time complementary loglog (cloglog) duration models of smoking initiation, 16-19 years old at interview — Law 20105 (cont.)**

| Model                                | (3)           |            |          |              | (4)           |            |          |              |
|--------------------------------------|---------------|------------|----------|--------------|---------------|------------|----------|--------------|
|                                      | Variables     | Est.       | SE       | HR           | CI            | Est.       | SE       | HR           |
| Law 20105, August 2006               | -<br>0.3<br>4 |            | 0.7<br>1 | (0.69, 0.73) | -<br>0.3<br>5 |            | 0.7<br>0 | (0.69, 0.72) |
| Sex (ref, boys)                      | -<br>0.1<br>5 |            | 0.8<br>6 | (0.85, 0.87) | -<br>0.1<br>5 |            | 0.8<br>6 | (0.85, 0.87) |
| Education, mother (ref, primary)     |               |            |          |              |               |            |          |              |
| secondary                            | 0.0<br>4      | (0.009)*** | 1.0<br>4 | (1.03, 1.06) | 0.0<br>3      | (0.008)*** | 1.0<br>3 | (1.02, 1.05) |
| > secondary                          | 0.0<br>4      | (0.012)*** | 1.0<br>4 | (1.02, 1.07) | 0.0<br>1      | (0.009)    | 1.0<br>1 | (1.00, 1.03) |
| School type (ref, pública municipal) |               |            |          |              |               |            |          |              |
| privada subvencionada                | 0.0<br>0      | (0.009)    | 1.0<br>0 | (0.99, 1.02) | 0.0<br>2      | (0.011)*   | 1.0<br>2 | (1.00, 1.04) |
| privada pagada                       | -<br>0.0<br>1 |            | 0.9<br>9 | (0.96, 1.01) | 0.0<br>2      | (0.015)    | 1.0<br>2 | (0.99, 1.05) |
| Region (ref, Santiago)               |               |            |          |              |               |            |          |              |
| Arica, Parinacota, Tarapacá          | -<br>0.1<br>8 |            | 0.8<br>4 | (0.80, 0.86) | -<br>0.1<br>8 |            | 0.8<br>4 | (0.80, 0.87) |
| Antofagasta                          | -<br>0.0<br>5 |            | 0.9<br>5 | (0.91, 0.99) | -<br>0.0<br>4 |            | 0.9<br>6 | (0.92, 1.00) |
| Atacama                              | -<br>0.0<br>5 |            | 0.9<br>5 | (0.91, 1.00) | -<br>0.0<br>5 |            | 0.9<br>5 | (0.91, 1.01) |
| Coquimbo                             | -<br>0.0<br>6 |            | 0.9<br>4 | (0.90, 0.98) | -<br>0.0<br>6 |            | 0.9<br>4 | (0.90, 0.98) |
| Valparaíso                           | -<br>0.0<br>6 |            | 0.9<br>4 | (0.92, 0.97) | -<br>0.0<br>6 |            | 0.9<br>4 | (0.92, 0.97) |

|                                     |               |            |           |              |               |            |           |              |
|-------------------------------------|---------------|------------|-----------|--------------|---------------|------------|-----------|--------------|
| O'Higgins                           | -<br>0.1<br>2 | (0.020)*** | 0.8<br>9  | (0.86, 0.93) | -<br>0.1<br>1 | (0.020)*** | 0.9<br>0  | (0.86, 0.93) |
| Maule                               | -<br>0.2<br>1 | (0.017)*** | 0.8<br>1  | (0.78, 0.84) | -<br>0.2<br>1 | (0.017)*** | 0.8<br>1  | (0.79, 0.84) |
| Biobío                              | -<br>0.1<br>2 | (0.013)*** | 0.8<br>9  | (0.87, 0.91) | -<br>0.1<br>2 | (0.013)*** | 0.8<br>9  | (0.87, 0.91) |
| Araucanía                           | -<br>0.1<br>4 | (0.020)*** | 0.8<br>7  | (0.83, 0.90) | -<br>0.1<br>4 | (0.021)*** | 0.8<br>7  | (0.83, 0.90) |
| Los Lagos                           | -<br>0.0<br>4 | (0.017)**  | 0.9<br>6  | (0.93, 1.00) | -<br>0.0<br>4 | (0.017)**  | 0.9<br>6  | (0.93, 1.00) |
| Aysén                               | 0.0<br>3      | (0.037)    | 1.0<br>3  | (0.96, 1.11) | 0.0<br>3      | (0.037)    | 1.0<br>3  | (0.96, 1.11) |
| Magallanes                          | 0.0<br>5      | (0.030)*   | 1.0<br>5  | (0.99, 1.12) | 0.0<br>5      | (0.030)*   | 1.0<br>5  | (0.99, 1.12) |
| Duration dependency                 |               |            |           |              |               |            |           |              |
| <b>Model</b>                        | <b>(3)</b>    |            |           |              | <b>(4)</b>    |            |           |              |
| <b>Variables</b>                    | <b>Est.</b>   | <b>SE</b>  | <b>HR</b> | <b>CI</b>    | <b>Est.</b>   | <b>SE</b>  | <b>HR</b> | <b>CI</b>    |
| <i>t</i>                            | 0.0<br>5      | (0.002)*** | 1.0<br>5  | (1.05, 1.06) | 0.0<br>5      | (0.002)*** | 1.0<br>5  | (1.05, 1.06) |
| <i>t</i> <sup>2</sup>               | 0.0<br>0      | (0.000)*** | 1.0<br>0  | (1.00, 1.00) | 0.0<br>0      | (0.000)*** | 1.0<br>0  | (1.00, 1.00) |
| <i>t</i> <sup>3</sup>               | -<br>0.0<br>0 | (0.000)*** | 1.0<br>0  | (1.00, 1.00) | -<br>0.0<br>0 | (0.000)*** | 1.0<br>0  | (1.00, 1.00) |
| Interactions                        |               |            |           |              |               |            |           |              |
| Law 20105 x sex                     |               |            |           |              |               |            |           |              |
| Law 20105 x secondary               | -<br>0.0<br>3 | (0.016)**  | 0.9<br>7  | (0.94, 1.00) |               |            |           |              |
| Law 20105 x > secondary             | -<br>0.0<br>7 | (0.019)*** | 0.9<br>3  | (0.89, 0.96) |               |            |           |              |
| Law 20105 x 'privada subvencionada' |               |            |           |              | -<br>0.0<br>4 | (0.018)**  | 0.9<br>6  | (0.93, 1.00) |

|                                 |               |            |          |              |               |            |          |              |
|---------------------------------|---------------|------------|----------|--------------|---------------|------------|----------|--------------|
| Law 20105 x 'privada pagada'    |               |            |          |              | -<br>0.0<br>8 | (0.025)*** | 0.9<br>2 | (0.88, 0.96) |
| Intercept                       | -<br>7.7<br>6 | (0.036)*** | 0.0<br>0 | (0.00, 0.00) | -<br>7.7<br>6 | (0.036)*** | 0.0<br>0 | (0.00, 0.00) |
| Law 20105, hazard ratios        |               |            |          |              |               |            |          |              |
| all                             |               |            |          |              |               |            |          |              |
| sex: female                     |               |            |          |              |               |            |          |              |
| sex: male                       |               |            |          |              |               |            |          |              |
| mother's education: primary     | -<br>0.3<br>4 | (0.015)*** | 0.7<br>1 | (0.69, 0.73) |               |            |          |              |
| mother's education: secondary   | -<br>0.3<br>7 | (0.011)*** | 0.6<br>9 | (0.67, 0.70) |               |            |          |              |
| mother's education: > secondary | -<br>0.4<br>1 | (0.013)*** | 0.6<br>6 | (0.64, 0.68) |               |            |          |              |
| school: pública municipal       |               |            |          |              | -<br>0.3<br>5 | (0.013)*** | 0.7<br>0 | (0.69, 0.72) |
| school: privada subvencionada   |               |            |          |              | -<br>0.3<br>9 | (0.013)*** | 0.6<br>8 | (0.66, 0.69) |
| school: privada pagada          |               |            |          |              | -<br>0.4<br>3 | (0.021)*** | 0.6<br>5 | (0.62, 0.67) |

Notes. Est, estimates; SE, standard errors clustered at school-level; HR, hazard ratios; ln, natural log; number of observations, 15,177,836; number of individuals, 181,624; number of failures, 135,019; \*, \*\*, and \*\*\*, significant at 10%, 5%, and 1%, respectively.

**eTable 3. Discrete-time complementary loglog (cloglog) duration models of smoking initiation, 16-19 years old at interview — Law 20105 (cont.)**

| <b>Model</b>                         | <b>(5)</b>  |            |           |              |
|--------------------------------------|-------------|------------|-----------|--------------|
| <b>Variables</b>                     | <b>Est.</b> | <b>SE</b>  | <b>HR</b> | <b>CI</b>    |
| Law 20105, August 2006               | -0.34       | (0.018)*** | 0.71      | (0.69, 0.74) |
| Sex (ref, boys)                      | -0.16       | (0.008)*** | 0.85      | (0.84, 0.87) |
| Education, mother (ref, primary)     |             |            |           |              |
| secondary                            | 0.04        | (0.009)*** | 1.04      | (1.02, 1.06) |
| > secondary                          | 0.03        | (0.012)*** | 1.03      | (1.01, 1.06) |
| School type (ref, pública municipal) |             |            |           |              |
| privada subvencionada                | 0.02        | (0.011)    | 1.02      | (0.99, 1.04) |
| privada pagada                       | 0.01        | (0.015)    | 1.01      | (0.98, 1.04) |
| Region (ref, Santiago)               |             |            |           |              |
| Arica, Parinacota, Tarapacá          | -0.18       | (0.020)*** | 0.84      | (0.80, 0.87) |
| Antofagasta                          | -0.05       | (0.021)**  | 0.95      | (0.92, 1.00) |
| Atacama                              | -0.05       | (0.026)*   | 0.95      | (0.91, 1.01) |
| Coquimbo                             | -0.06       | (0.021)*** | 0.94      | (0.90, 0.98) |
| Valparaíso                           | -0.06       | (0.013)*** | 0.94      | (0.92, 0.97) |
| O'Higgins                            | -0.11       | (0.020)*** | 0.90      | (0.86, 0.93) |
| Maule                                | -0.21       | (0.017)*** | 0.81      | (0.78, 0.84) |
| Biobío                               | -0.12       | (0.013)*** | 0.89      | (0.87, 0.91) |
| Araucanía                            | -0.14       | (0.021)*** | 0.87      | (0.83, 0.90) |
| Los Lagos                            | -0.04       | (0.017)**  | 0.96      | (0.93, 1.00) |
| Aysén                                | 0.03        | (0.037)    | 1.03      | (0.96, 1.11) |
| Magallanes                           | 0.05        | (0.030)*   | 1.05      | (1.00, 1.12) |
| Duration dependency                  |             |            |           |              |
| <i>t</i>                             | 0.05        | (0.002)*** | 1.05      | (1.05, 1.06) |
| <b>Model</b>                         | <b>(5)</b>  |            |           |              |
| <b>Variables</b>                     | <b>Est.</b> | <b>SE</b>  | <b>HR</b> | <b>CI</b>    |
| $t^2$                                | 0.00        | (0.000)*** | 1.00      | (1.00, 1.00) |
| $t^3$                                | -0.00       | (0.000)*** | 1.00      | (1.00, 1.00) |
| Interactions                         |             |            |           |              |

|                                                                                                                                                                                                                                                                          |       |            |      |              |
|--------------------------------------------------------------------------------------------------------------------------------------------------------------------------------------------------------------------------------------------------------------------------|-------|------------|------|--------------|
| Law 20105 x sex                                                                                                                                                                                                                                                          | 0.03  | (0.013)*   | 1.03 | (1.00, 1.05) |
| Law 20105 x secondary                                                                                                                                                                                                                                                    | -0.03 | (0.016)*   | 0.97 | (0.94, 1.00) |
| Law 20105 x > secondary                                                                                                                                                                                                                                                  | -0.06 | (0.019)*** | 0.94 | (0.91, 0.98) |
| Law 20105 x 'privada subvencionada'                                                                                                                                                                                                                                      | -0.03 | (0.018)*   | 0.97 | (0.93, 1.00) |
| Law 20105 x 'privada pagada'                                                                                                                                                                                                                                             | -0.07 | (0.026)**  | 0.93 | (0.89, 0.99) |
| Intercept                                                                                                                                                                                                                                                                | -7.76 | (0.037)*** | 0.00 | (0.00, 0.00) |
| Law 20105, hazard ratios                                                                                                                                                                                                                                                 |       |            |      |              |
| all                                                                                                                                                                                                                                                                      | -0.38 | (0.008)*** | 0.68 | (0.67, 0.70) |
| sex: female                                                                                                                                                                                                                                                              | -0.39 | (0.011)*** | 0.68 | (0.66, 0.69) |
| sex: male                                                                                                                                                                                                                                                                | -0.37 | (0.011)*** | 0.69 | (0.68, 0.71) |
| mother's education: primary                                                                                                                                                                                                                                              | -0.34 | (0.015)*** | 0.71 | (0.69, 0.73) |
| mother's education: secondary                                                                                                                                                                                                                                            | -0.37 | (0.011)*** | 0.69 | (0.67, 0.70) |
| mother's education: > secondary                                                                                                                                                                                                                                          | -0.41 | (0.013)*** | 0.66 | (0.64, 0.68) |
| school: pública municipal                                                                                                                                                                                                                                                | -0.35 | (0.013)*** | 0.70 | (0.69, 0.72) |
| school: privada subvencionada                                                                                                                                                                                                                                            | -0.39 | (0.013)*** | 0.68 | (0.66, 0.70) |
| school: privada pagada                                                                                                                                                                                                                                                   | -0.43 | (0.021)*** | 0.65 | (0.62, 0.68) |
| Notes. Est, estimates; SE, standard errors clustered at school-level; HR, hazard ratios; ln, natural log; number of observations, 15,177,836; number of individuals, 181,624; number of failures, 135,019; *, **, and ***, significant at 10%, 5%, and 1%, respectively. |       |            |      |              |
